# Supplementary material for: Impact of oxidized phospholipids on the structural and dynamic organization of phospholipid membranes: a combined DSC and solid state NMR study
Source: Royal Society of Chemistry journal article supplement (doi:10.1039/c2fd20089a), 2012-06-27
Supplement: c2fd20089a.pdf [file c2fd20089a.pdf]

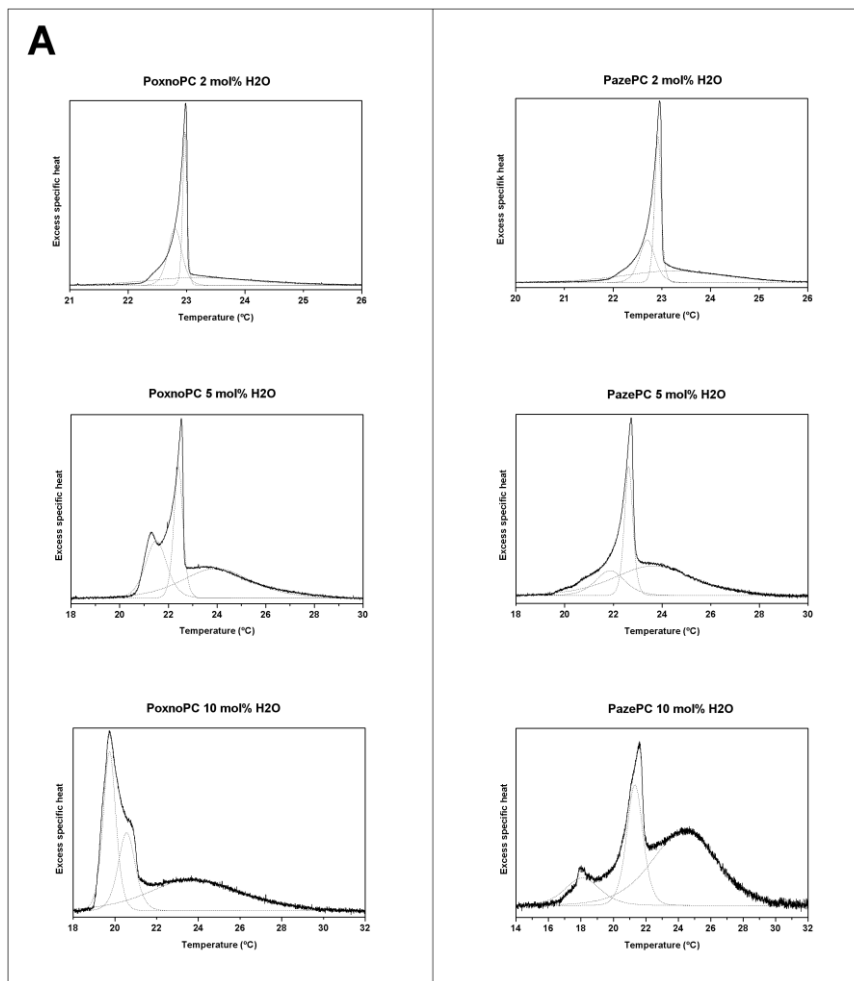

**Supplementary Fig. 1A.** Illustration of the results obtained in peak-fitting deconvolution analyses of the DSC thermograms of PoxnoPC- and PazePC-containing DMPC bilayers at different OxPI concentrations in 100 mM Tris/HCl (pH 7.4), 10 mM KCl, 140 mM NaCl, 0.5 mM EDTA using H<sub>2</sub>O as solvent.

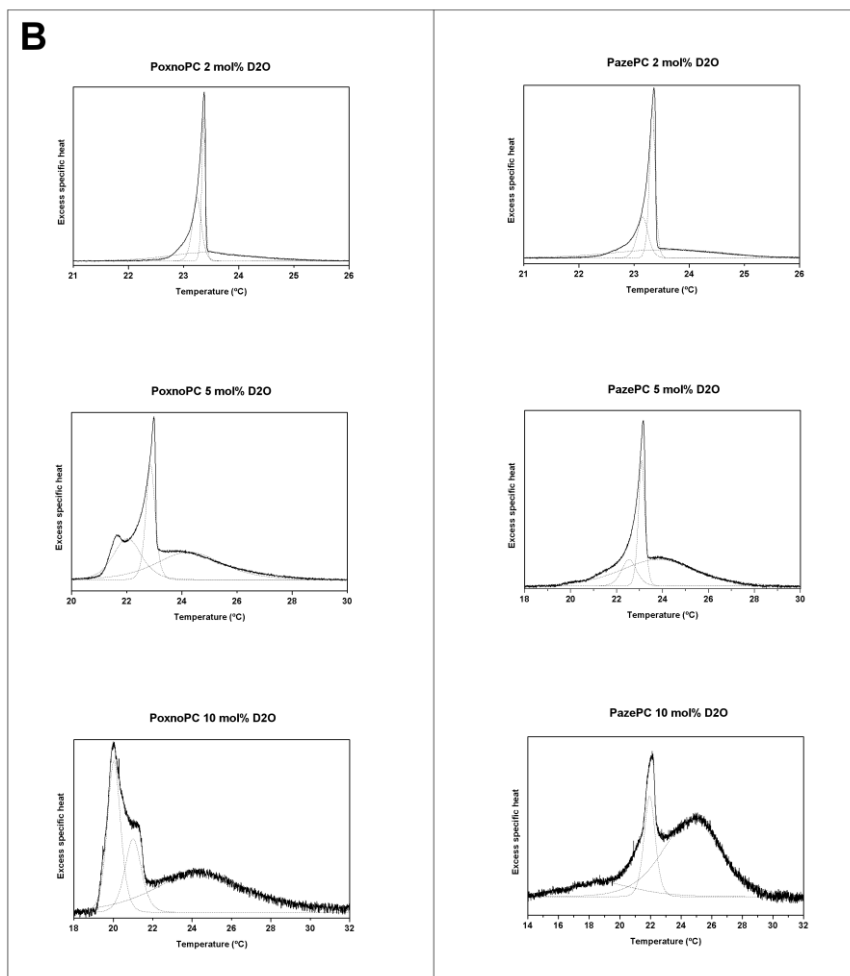

**Supplementary Fig. 1B.** Illustration of the results obtained in peak-fitting deconvolution analyses of the DSC thermograms of PoxnoPC- and PazePC-containing DMPC bilayers at different OxPI concentrations in 100 mM Tris/HCl (pH 7.4), 10 mM KCl, 140 mM NaCl, 0.5 mM EDTA using D<sub>2</sub>O as solvent.
